# Supplementary material for: Prognostic Significance of Cyclin D1 Expression in Small Intestinal Adenocarcinoma
Source: MDPI journal article supplement (doi:10.3390/cancers15205032), 2023-10-18
Supplement: s1 [file s1]

**Supplementary Table S1.** Previous studies on cyclin D1 expression in SIACs and CRCs.

| Study                            | Country (yr)       | IHC           | N   | Clone used           | Cyclin D1 <sup>High</sup> |            | Outcome           |
|----------------------------------|--------------------|---------------|-----|----------------------|---------------------------|------------|-------------------|
|                                  |                    |               |     |                      | Cut-off level             | N (%)      | Survival          |
| SIACs                            |                    |               |     |                      |                           |            |                   |
| Present                          | Korea              | TMA           | 232 | SP4                  | Score >3.5                | 145 (62.5) | Better OS         |
| Aber [22]                        | USA (1999)         | Whole section | 24  | Non-SP4 <sup>a</sup> | ≥ 10%                     | 24 (30.0)  | Decreased 3YSR    |
| CRCs                             |                    |               |     |                      |                           |            |                   |
| Jun [18]                         | Korea (2022)       | TMA           | 495 | SP4                  | Score ≥ 1                 | 389 (78.6) | Better OS and RFS |
| Jang [28]                        | Korea (2012)       | TMA           | 217 | SP4                  | ≥ 30%                     | 158 (72.5) | Better OS and RFS |
| Ogino [29]                       | USA (2009)         | TMA           | 602 | SP4                  | > 50%                     | 330 (54.8) | Better CSS        |
| Seicean [30]                     | Romania (2011)     | TMA           | 87  | SP4                  | > 10%                     | 47 (54.0)  | Not significant   |
| Stor [31]                        | Slovenia (2008)    | TMA           | 191 | SP4                  | NS                        | NS         | Not significant   |
| Hilska [32]                      | Finland (2005)     | TMA           | 363 | P2D11F11             | ≥ 1%                      | 99 (27.3)  | Better OS         |
| McKay [33]                       | UK (2002)          | Whole section | 249 | P2D11F11             | > 5%                      | 137 (55.0) | Better OS         |
| Von Stockmar-Von Wangenheim [34] | Germany (2008)     | Whole section | 200 | P2D11F11             | > 5%                      | 150 (75.0) | Not significant   |
| Lyll [35]                        | UK (2006)          | Whole section | 90  | P2D11F11             | > 5%                      | 46 (51.1)  | Not significant   |
| McKay [36]                       | UK (2000)          | Whole section | 100 | P2D11F11             | > 50%                     | 8 (8.0)    | Worse OS          |
| Bhatavdekar [37]                 | India (2001)       | Whole section | 98  | P2D11F11             | ≥ 1%                      | 30 (30.6)  | Worse OS          |
| Bahnassy [38]                    | Egypt (2004)       | Whole section | 60  | DCS-6                | Index ≥ 6.1               | 41 (68.3)  | Worse OS          |
| Moore [39]                       | USA (2004)         | Whole section | 40  | DCS-6                | > 10%                     | 6 (15.0)   | Not significant   |
| Holland [40]                     | UK (2001)          | Whole section | 126 | DCS-6                | > 10%                     | 74 (58.7)  | Better OS         |
| Maeda [41]                       | Japan (1998)       | Whole section | 123 | Non-SP4 <sup>a</sup> | > 50%                     | 20 (16.3)  | Worse OS and DFS  |
| Maeda [42]                       | Japan (1997)       | Whole section | 101 | Non-SP4 <sup>a</sup> | > 50%                     | 14 (13.9)  | Worse DFS         |
| Tsai [43]                        | Taiwan (2013)      | Whole section | 100 | NS                   | Score ≥ 2                 | 49 (49.0)  | Not significant   |
| Belt [44]                        | Netherlands (2012) | TMA           | 379 | NS                   | Score ≥ 8                 | 211 (55.7) | Not significant   |
| Mao [45]                         | China (2011)       | Whole section | 169 | NS                   | 5%                        | 95 (56.2)  | Worse OS          |
| Fang [46]                        | China (2009)       | TMA           | 532 | NS                   | ≥ 10%                     | 380 (71.4) | Not significant   |
| Kouraklis [47]                   | Greece (2006)      | Whole section | 111 | NS                   | > 5%                      | 71 (63.9)  | Not significant   |
| Bondi [48]                       | Norway (2005)      | Whole section | 219 | NS                   | ≥ 5%                      | 24 (11.0)  | Not significant   |
| Bondi [49]                       | Norway (2004)      | Whole section | 162 | NS                   | > 5%                      | NS         | Not significant   |

Small intestinal adenocarcinoma (SIAC); colorectal carcinoma (CRC); high expression of cyclin D1 (cyclin D1<sup>High</sup>); immunohistochemistry (IHC); tissue microarray (TMA); overall survival (OS); year-survival rate (YSR); recurrence-free survival (RFS); cancer specific survival (CSS); not stated (NS); disease-free survival (DFS).; <sup>a</sup>Among reports that did not precisely define the clones, three studies before novel SP4 was developed in 2004 were considered to use non-SP4.
